# Supplementary material for: Characterization and failure mode analyses of air plasma oxidized PDMS–PDMS bonding by peel testing
Source: Royal Society of Chemistry journal article supplement (doi:10.1039/c6ra25947b), 2017-01-01
Supplement: c6ra25947b1.pdf [file c6ra25947b1.pdf]

# Characterization and Failure Modes Analyses of Air Plasma Oxidized PDMS-PDMS Bonding by Peel Testing

C.-f. Chen and K. Wharton

Department of Mechanical Engineering, University of Alaska Fairbanks, Fairbanks, AK, USA

Email: cchen4@alaska.edu

## Supplementary Information

There were 13 different combinations of the plasma treatment parameters tested, as seen in Table 1 below. Of the 69 samples tested (three samples tested for each combination), there is 1 outlier that was associated with the treatment condition 200 mTorr in pressure, 6.8W in power, and 50 s in treatment time. Our results reported in this manuscript has excluded this outlier.

**Table 1** Experimental data.

| Pressure (mTorr) | Power (W) | Treatment Time (s) | Max. load (N/mm) | Failure mode | Pressure (mTorr) | Power (W) | Treatment Time (s) | Max. load (N/mm) | Failure mode |
|------------------|-----------|--------------------|------------------|--------------|------------------|-----------|--------------------|------------------|--------------|
| 200              | 6.8       | 40                 | 0.045            | peeling      | 300              | 6.8       | 30                 | 0.155            | tearing      |
| 200              | 6.8       | 40                 | 0.0358           | peeling      | 300              | 6.8       | 40                 | 0.132            | tearing      |
| 200              | 6.8       | 40                 | 0.0263           | peeling      | 300              | 6.8       | 40                 | 0.132            | tearing      |
| 200              | 6.8       | 50                 | 0.208            | tearing      | 300              | 6.8       | 40                 | 0.14             | tearing      |
| 200              | 6.8       | 50                 | 0.168            | tearing      | 300              | 6.8       | 50                 | 0.111            | tearing      |
| 200              | 6.8       | 60                 | 0.186            | tearing      | 300              | 6.8       | 50                 | 0.132            | tearing      |
| 200              | 6.8       | 60                 | 0.184            | tearing      | 300              | 6.8       | 50                 | 0.14             | tearing      |
| 200              | 6.8       | 60                 | 0.174            | tearing      | 300              | 6.8       | 60                 | 0.129            | tearing      |
| 200              | 10.5      | 30                 | 0.04             | peeling      | 300              | 6.8       | 60                 | 0.147            | tearing      |
| 200              | 10.5      | 30                 | 0.17             | tearing      | 300              | 6.8       | 60                 | 0.179            | tearing      |
| 200              | 10.5      | 30                 | 0.198            | tearing      | 300              | 10.5      | 30                 | 0.074            | peeling      |
| 200              | 10.5      | 40                 | 0.195            | tearing      | 300              | 10.5      | 30                 | 0.153            | tearing      |
| 200              | 10.5      | 40                 | 0.06             | peeling      | 300              | 10.5      | 30                 | 0.09             | mixed        |
| 200              | 10.5      | 40                 | 0.155            | tearing      | 300              | 10.5      | 40                 | 0.09             | peeling      |
| 200              | 10.5      | 50                 | 0.06             | peeling      | 300              | 10.5      | 40                 | 0.182            | tearing      |
| 200              | 10.5      | 50                 | 0.201            | tearing      | 300              | 10.5      | 40                 | 0.182            | tearing      |
| 200              | 10.5      | 50                 | 0.22             | tearing      | 300              | 10.5      | 50                 | 0.118            | tearing      |
| 200              | 10.5      | 60                 | 0.217            | tearing      | 300              | 10.5      | 50                 | 0.14             | tearing      |
| 200              | 10.5      | 60                 | 0.227            | tearing      | 300              | 10.5      | 50                 | 0.142            | tearing      |
| 200              | 10.5      | 60                 | 0.06             | peeling      | 300              | 10.5      | 60                 | 0.147            | tearing      |
| 200              | 18        | 30                 | 0.07             | peeling      | 300              | 10.5      | 60                 | 0.132            | peeling      |
| 200              | 18        | 30                 | 0.142            | tearing      | 300              | 10.5      | 60                 | 0.163            | tearing      |
| 200              | 18        | 30                 | 0.203            | tearing      | 300              | 18        | 30                 | 0.158            | tearing      |
| 200              | 18        | 40                 | 0.231            | tearing      | 300              | 18        | 30                 | 0.053            | mixed        |
| 200              | 18        | 40                 | 0.11             | peeling      | 300              | 18        | 30                 | 0.161            | tearing      |
| 200              | 18        | 40                 | 0.231            | tearing      | 300              | 18        | 40                 | 0.155            | tearing      |
| 200              | 18        | 50                 | 0.15             | tearing      | 300              | 18        | 40                 | 0.082            | tearing      |
| 200              | 18        | 50                 | 0.269            | tearing      | 300              | 18        | 40                 | 0.161            | tearing      |
| 200              | 18        | 50                 | 0.166            | tearing      | 300              | 18        | 50                 | 0.121            | tearing      |
| 200              | 18        | 60                 | 0.229            | tearing      | 300              | 18        | 50                 | 0.216            | tearing      |
| 200              | 18        | 60                 | 0.205            | tearing      | 300              | 18        | 50                 | 0.147            | tearing      |

|     |     |    |       |         |     |    |    |       |         |
|-----|-----|----|-------|---------|-----|----|----|-------|---------|
| 200 | 18  | 60 | 0.085 | mixed   | 300 | 18 | 60 | 0.192 | tearing |
| 300 | 6.8 | 30 | 0.153 | tearing | 300 | 18 | 60 | 0.169 | tearing |
| 300 | 6.8 | 30 | 0.134 | mixed   | 300 | 18 | 60 | 0.205 | tearing |

Based on Kendall's work,<sup>1</sup> below we present a revised energy balance equation to describe peeling of two elastic thin films from each other. Consider two elastic thin films bonded as shown in Figure 1. The peeling force  $F$  is applied to progressively separate the bonding. For our peel testing,  $F$  is the maximum load at which the bonded PDMS strips begins to separate. Kendall's equation is based on the conservation of energy under a quasi-static loading condition in de-bonding the specimen over a length  $\Delta c$ :

$$U_p + U_A + U_E = 0 \quad (1)$$

where  $U_p$  is the potential change due to work done on the specimen,  $U_S$  is the adhesive energy released during de-bonding, and  $U_E$  is a change elastic strain energy of the specimen. Each energy term is described below.

$U_p$  is obtained by multiplying the peeling force  $F$  by its movement in the direction of  $F$  for each strip of the bonded assembly. Let  $\theta$  be the angle between the tangent to the bonding interface and the direction of the peeling force. Per the sketch in Figure 2, the net displacement of point A in the direction of the peeling force  $F$  after over a length  $\Delta c$  of de-bonding is  $\Delta c(1 - \cos \theta)$ . (It can be calculated by projecting the segment  $\overline{AA'}$  onto the direction of  $F$ .) Therefore,  $U_p$  is equal to  $2F\Delta c(1 - \cos \theta)$ . This value is twice as large as formulated by Kendall because two elastic thin-film strips are considered, as oppose to Kendall's formulation for one elastic strip peeled from a solid substrate.

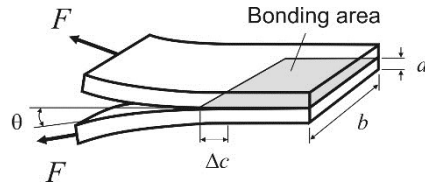

Figure 1. Peeling of two elastic thin films.

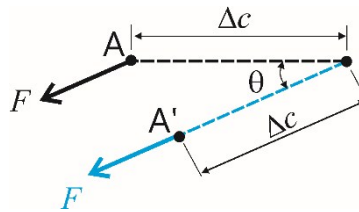

Figure 2. Configuration of the displacement of the de-bonded surface. The configuration of a length  $\Delta c$  before de-bonding (in black) and after de-bonding (in blue).

$U_A$  is the adhesive energy released from the de-bonded surface and equal to  $-Rb\Delta c$ , where  $R$  is the adhesive energy per unit area.

$U_E$  is the strain energy stored in the system and equal to  $\frac{F^2\Delta c}{Ebd}$ , where  $E$  is the Young's modulus of the thin film.

Per Eq. (1), the conservation of potential energy leads to:

$$Rb\Delta c + 2F\Delta c(1 - \cos \theta) + \frac{F^2\Delta c}{Ebd} = 0 \quad (2)$$

Equation (2) can be further simplified. Per Kendall's argument, for soft materials like PDMS, the strain energy  $U_E$  can be neglected (because the stress  $\frac{F}{bd}$  is much smaller than the Young's modulus  $E$ ). It leads to

$$R = 2\frac{F}{b}(1 - \cos \theta) \quad (3)$$

where  $F/b$  is the maximum load per unit width of each thin-film strip.

## References

1. K. Kendall, *Journal of Physics D: Applied Physics*, 1975, **8**, 1449.
